# Supplementary material for: Common variants of ZNF750, RPTOR and TRAF3IP2 genes and psoriasis risk
Source: PubMed Central journal article supplement (PMC3955134; doi:10.1007/s00403-013-1407-9), 2013-09-05
Supplement: 403_2013_1407_MOESM1_ESM.pdf [file 403_2013_1407_MOESM1_ESM.pdf]

Online resource 1

Statistical analyses of clinical subphenotypes

\*\*\*\*\* Arthropatic psoriasis as dependent variable \*\*\*\*\*

```
summary(glm(LZS~., data=CASES_PSO2))
```

```
glm(formula = LZS ~ ., data = CASES_PSO2)
```

Deviance Residuals:

| Min      | 1Q       | Median   | 3Q      | Max     |
|----------|----------|----------|---------|---------|
| -0.42311 | -0.20327 | -0.11464 | 0.01502 | 0.96786 |

Coefficients: (4 not defined because of singularities)

|                       | Estimate  | Std. Error | t value | Pr(> t )   |
|-----------------------|-----------|------------|---------|------------|
| sexM                  | -0.066845 | 0.054074   | -1.236  | 0.21788    |
| FH01                  | -0.022941 | 0.052442   | -0.437  | 0.66226    |
| yob                   | 0.001729  | 0.001668   | 1.037   | 0.30102    |
| PASI                  | -0.019932 | 0.057717   | -0.345  | 0.73020    |
| NAPSI                 | 0.195172  | 0.060400   | 3.231   | 0.00145 ** |
| skinII                | 0.097059  | 0.380804   | 0.255   | 0.79908    |
| skinIII               | 0.159373  | 0.383855   | 0.415   | 0.67846    |
| skinIII/IV            | 0.001204  | 0.466529   | 0.003   | 0.99794    |
| skinIV                | -0.010698 | 0.431447   | -0.025  | 0.98024    |
| smoke                 | -0.067225 | 0.053928   | -1.247  | 0.21404    |
| pustular.             | -0.156592 | 0.114603   | -1.366  | 0.17338    |
| RAPTOR_rs869190GT     | 0.243525  | 0.094650   | 2.573   | 0.01082    |
| RAPTOR_rs869190TT     | 0.032131  | 0.384023   | 0.084   | 0.93340    |
| RAPTOR_rs11658698CT   | 0.077493  | 0.054882   | 1.412   | 0.15954    |
| RAPTOR_rs11658698TT   | 0.037785  | 0.095009   | 0.398   | 0.69129    |
| RAPTOR_rs12602885AA   | 0.126285  | 0.400032   | 0.316   | 0.75258    |
| RAPTOR_rs12602885AG   | -0.176429 | 0.097033   | -1.818  | 0.07056 .  |
| ZNF750_rs8074277CC    | 0.276685  | 0.429038   | 0.645   | 0.51975    |
| ZNF750_rs8074277CT    | 0.066472  | 0.063131   | 1.053   | 0.29367    |
| ZNF750_rs11077947AG   | -0.097620 | 0.068073   | -1.434  | 0.15315    |
| ZNF750_rs11077947GG   | -0.064306 | 0.088665   | -0.725  | 0.46915    |
| ZNF750_rs12450046AA   | -0.123881 | 0.377538   | -0.328  | 0.74317    |
| ZNF750_rs12450046AG   | NA        | NA         | NA      | NA         |
| TRAF3IP2_rs13190932AA | -0.035034 | 0.172259   | -0.203  | 0.83905    |
| TRAF3IP2_rs13190932AG | 0.135438  | 0.327971   | 0.413   | 0.68009    |
| TRAF3IP2_rs13196377AA | NA        | NA         | NA      | NA         |
| TRAF3IP2_rs13196377AG | -0.020091 | 0.272795   | -0.074  | 0.94137    |
| TRAF3IP2_rs13210247AG | -0.035376 | 0.148754   | -0.238  | 0.81227    |
| TRAF3IP2_rs13210247GG | NA        | NA         | NA      | NA         |
| TRAF3IP2_rs33980500CT | -0.091284 | 0.105511   | -0.865  | 0.38801    |
| TRAF3IP2_rs33980500TT | NA        | NA         | NA      | NA         |

|            | OR         | 2.5 %        | 97.5 %   |
|------------|------------|--------------|----------|
| sexM       | 0.93534051 | 8.412821e-01 | 1.039915 |
| FH01       | 0.97731972 | 8.818560e-01 | 1.083118 |
| yob        | 1.00173072 | 9.984621e-01 | 1.005010 |
| PASI       | 0.98026489 | 8.754167e-01 | 1.097671 |
| NAPSI      | 1.21552000 | 1.079816e+00 | 1.368278 |
| skinII     | 1.10192533 | 5.224095e-01 | 2.324306 |
| skinIII    | 1.17277582 | 5.526841e-01 | 2.488588 |
| skinIII/IV | 1.00120492 | 4.012475e-01 | 2.498237 |
| skinIV     | 0.98935898 | 4.247231e-01 | 2.304634 |

|                       |            |              |          |
|-----------------------|------------|--------------|----------|
| smoke                 | 0.93498502 | 8.412036e-01 | 1.039222 |
| pustular.             | 0.85505279 | 6.830341e-01 | 1.070393 |
| RAPTOR_rs869190GT     | 1.27573811 | 1.059731e+00 | 1.535774 |
| RAPTOR_rs869190TT     | 1.03265291 | 4.864892e-01 | 2.191975 |
| RAPTOR_rs11658698CT   | 1.08057496 | 9.703739e-01 | 1.203291 |
| RAPTOR_rs11658698TT   | 1.03850743 | 8.620605e-01 | 1.251070 |
| RAPTOR_rs12602885AA   | 1.13460523 | 5.180086e-01 | 2.485150 |
| RAPTOR_rs12602885AG   | 0.83825833 | 6.930795e-01 | 1.013848 |
| ZNF750_rs8074277CC    | 1.31875135 | 5.688077e-01 | 3.057457 |
| ZNF750_rs8074277CT    | 1.06873138 | 9.443457e-01 | 1.209501 |
| ZNF750_rs11077947AG   | 0.90699389 | 7.937082e-01 | 1.036449 |
| ZNF750_rs11077947GG   | 0.93771793 | 7.881351e-01 | 1.115691 |
| ZNF750_rs12450046AA   | 0.88348535 | 4.215399e-01 | 1.851655 |
| ZNF750_rs12450046AG   | NA         | NA           | NA       |
| TRAF3IP2_rs13190932AA | 0.96557291 | 6.889032e-01 | 1.353356 |
| TRAF3IP2_rs13190932AG | 1.14503832 | 6.020749e-01 | 2.177657 |
| TRAF3IP2_rs13196377AA | NA         | NA           | NA       |
| TRAF3IP2_rs13196377AG | 0.98010971 | 5.742103e-01 | 1.672932 |
| TRAF3IP2_rs13210247AG | 0.96524286 | 7.211359e-01 | 1.291981 |
| TRAF3IP2_rs13210247GG | NA         | NA           | NA       |
| TRAF3IP2_rs33980500CT | 0.91275818 | 7.422406e-01 | 1.122449 |
| TRAF3IP2_rs33980500TT | NA         | NA           | NA       |

per allele:

```
a <- (glm(LZS~., data=CASES_PSO))
summary(a)
```

Coefficients:

|                     | Estimate  | Std. Error | t value | Pr(> t )   |
|---------------------|-----------|------------|---------|------------|
| sexM                | -0.077788 | 0.053196   | -1.462  | 0.14522    |
| FH01                | -0.026037 | 0.051371   | -0.507  | 0.61282    |
| yob                 | 0.001600  | 0.001631   | 0.981   | 0.32768    |
| PASI                | -0.017683 | 0.056933   | -0.311  | 0.75643    |
| NAPSI               | 0.183749  | 0.059528   | 3.087   | 0.00231 ** |
| skinII              | 0.063412  | 0.376746   | 0.168   | 0.86650    |
| skinIII             | 0.122717  | 0.379436   | 0.323   | 0.74671    |
| skinIII/IV          | -0.053940 | 0.460297   | -0.117  | 0.90683    |
| skinIV              | -0.043423 | 0.425609   | -0.102  | 0.91884    |
| smoke               | -0.065502 | 0.053357   | -1.228  | 0.22102    |
| pustular.           | -0.154118 | 0.113476   | -1.358  | 0.17593    |
| RAPTOR_rs869190     | 0.217056  | 0.088570   | 2.451   | 0.01511    |
| RAPTOR_rs11658698   | 0.046144  | 0.040744   | 1.133   | 0.25875    |
| RAPTOR_rs12602885   | -0.153715 | 0.090753   | -1.694  | 0.09185 .  |
| ZNF750_rs8074277    | 0.195074  | 0.381208   | 0.512   | 0.60940    |
| ZNF750_rs11077947   | -0.027263 | 0.043434   | -0.628  | 0.53092    |
| ZNF750_rs12450046   | -0.131905 | 0.372977   | -0.354  | 0.72397    |
| TRAF3IP2_rs13190932 | 0.113787  | 0.322549   | 0.353   | 0.72463    |
| TRAF3IP2_rs13196377 | -0.019017 | 0.268843   | -0.071  | 0.94368    |
| TRAF3IP2_rs13210247 | -0.032103 | 0.144427   | -0.222  | 0.82432    |
| TRAF3IP2_rs33980500 | -0.079622 | 0.104129   | -0.765  | 0.44537    |

|            | OR         | 2.5 %        | 97.5 %   |
|------------|------------|--------------|----------|
| sexM       | 0.92516077 | 8.335598e-01 | 1.026828 |
| FH01       | 0.97429931 | 8.809778e-01 | 1.077506 |
| yob        | 1.00160125 | 9.984052e-01 | 1.004808 |
| PASI       | 0.98247250 | 8.787369e-01 | 1.098454 |
| NAPSI      | 1.20171410 | 1.069377e+00 | 1.350427 |
| skinII     | 1.06546588 | 5.091580e-01 | 2.229598 |
| skinIII    | 1.13056404 | 5.374255e-01 | 2.378330 |
| skinIII/IV | 0.94748907 | 3.843870e-01 | 2.335499 |

```

skinIV          0.95750622 4.157789e-01 2.205062
smoke           0.93659702 8.435969e-01 1.039850
pustular.      0.85717070 6.862402e-01 1.070677
RAPTOR_rs869190 1.24241318 1.044419e+00 1.477942
RAPTOR_rs11658698 1.04722533 9.668499e-01 1.134282
RAPTOR_rs12602885 0.85751628 7.177838e-01 1.024451
ZNF750_rs8074277 1.21540051 5.757513e-01 2.565689
ZNF750_rs11077947 0.97310527 8.936930e-01 1.059574
ZNF750_rs12450046 0.87642458 4.219256e-01 1.820511
TRAF3IP2_rs13190932 1.12051352 5.954741e-01 2.108489
TRAF3IP2_rs13196377 0.98116289 5.792969e-01 1.661809
TRAF3IP2_rs13210247 0.96840684 7.296620e-01 1.285269
TRAF3IP2_rs33980500 0.92346513 7.529845e-01 1.132544

```

LZS is significantly associated with NAPSI and RAPTOR\_rs869190GT.

\*\*\*\*\* NAPSI as dependent variable \*\*\*\*\*

```
glm(formula = NAPSI ~ ., data = CASES_PSO2)
```

|                       | Estimate  | Std. Error | t value | Pr(> t ) |     |
|-----------------------|-----------|------------|---------|----------|-----|
| sexM                  | 0.058305  | 0.062414   | 0.934   | 0.351369 |     |
| FH01                  | -0.066559 | 0.060272   | -1.104  | 0.270810 |     |
| yob                   | -0.006773 | 0.001865   | -3.632  | 0.000360 | *** |
| LZS                   | 0.259150  | 0.080199   | 3.231   | 0.001445 | **  |
| PASI                  | 0.187939  | 0.065159   | 2.884   | 0.004361 | **  |
| skinII                | 0.488857  | 0.437483   | 1.117   | 0.265179 |     |
| skinIII               | 0.465189  | 0.441263   | 1.054   | 0.293079 |     |
| skinIII/IV            | -0.059694 | 0.537567   | -0.111  | 0.911694 |     |
| skinIV                | 0.403482  | 0.496322   | 0.813   | 0.417237 |     |
| smoke                 | 0.045947  | 0.062301   | 0.738   | 0.461697 |     |
| pustular.             | -0.105786 | 0.132470   | -0.799  | 0.425508 |     |
| RAPTOR_rs869190GT     | -0.179716 | 0.110146   | -1.632  | 0.104366 |     |
| RAPTOR_rs869190TT     | 0.078086  | 0.442484   | 0.176   | 0.860106 |     |
| RAPTOR_rs11658698CT   | -0.056515 | 0.063433   | -0.891  | 0.374057 |     |
| RAPTOR_rs11658698TT   | -0.049248 | 0.109467   | -0.450  | 0.653289 |     |
| RAPTOR_rs12602885AA   | -0.402558 | 0.460178   | -0.875  | 0.382760 |     |
| RAPTOR_rs12602885AG   | 0.117560  | 0.112438   | 1.046   | 0.297053 |     |
| ZNF750_rs8074277CC    | -0.316866 | 0.494388   | -0.641  | 0.522319 |     |
| ZNF750_rs8074277CT    | -0.054759 | 0.072847   | -0.752  | 0.453132 |     |
| ZNF750_rs11077947AG   | 0.029030  | 0.078823   | 0.368   | 0.713051 |     |
| ZNF750_rs11077947GG   | -0.091140 | 0.102098   | -0.893  | 0.373131 |     |
| ZNF750_rs12450046AA   | 0.077335  | 0.435123   | 0.178   | 0.859118 |     |
| ZNF750_rs12450046AG   | NA        | NA         | NA      | NA       |     |
| TRAF3IP2_rs13190932AA | 0.187147  | 0.198065   | 0.945   | 0.345885 |     |
| TRAF3IP2_rs13190932AG | -0.681197 | 0.374943   | -1.817  | 0.070775 | .   |
| TRAF3IP2_rs13196377AA | NA        | NA         | NA      | NA       |     |
| TRAF3IP2_rs13196377AG | 0.418620  | 0.312922   | 1.338   | 0.182519 |     |
| TRAF3IP2_rs13210247AG | 0.272073  | 0.170329   | 1.597   | 0.111801 |     |
| TRAF3IP2_rs13210247GG | NA        | NA         | NA      | NA       |     |
| TRAF3IP2_rs33980500CT | 0.024671  | 0.121800   | 0.203   | 0.839691 |     |
| TRAF3IP2_rs33980500TT | NA        | NA         | NA      | NA       |     |

|         | OR           | 2.5 %     | 97.5 %       |
|---------|--------------|-----------|--------------|
| sexM    | 1.060038e+00 | 0.9379827 | 1.197975e+00 |
| FH01    | 9.356077e-01 | 0.8313624 | 1.052924e+00 |
| yob     | 9.932499e-01 | 0.9896258 | 9.968873e-01 |
| LZS     | 1.295828e+00 | 1.1073426 | 1.516397e+00 |
| PASI    | 1.206760e+00 | 1.0620810 | 1.371149e+00 |
| skinII  | 1.630451e+00 | 0.6917056 | 3.843213e+00 |
| skinIII | 1.592315e+00 | 0.6705411 | 3.781225e+00 |

|                       |              |           |              |
|-----------------------|--------------|-----------|--------------|
| skinIII/IV            | 9.420524e-01 | 0.3284713 | 2.701797e+00 |
| skinIV                | 1.497028e+00 | 0.5659260 | 3.960046e+00 |
| smoke                 | 1.047019e+00 | 0.9266678 | 1.183001e+00 |
| L.kros1k.             | 8.996170e-01 | 0.6939034 | 1.166316e+00 |
| RAPTOR_rs869190GT     | 8.355072e-01 | 0.6732770 | 1.036828e+00 |
| RAPTOR_rs869190TT     | 1.081215e+00 | 0.4542229 | 2.573684e+00 |
| RAPTOR_rs11658698CT   | 9.450522e-01 | 0.8345669 | 1.070164e+00 |
| RAPTOR_rs11658698TT   | 9.519453e-01 | 0.7681279 | 1.179751e+00 |
| RAPTOR_rs12602885AA   | 6.686077e-01 | 0.2713108 | 1.647690e+00 |
| RAPTOR_rs12602885AG   | 1.124749e+00 | 0.9022951 | 1.402047e+00 |
| ZNF750_rs8074277CC    | 7.284282e-01 | 0.2764159 | 1.919599e+00 |
| ZNF750_rs8074277CT    | 9.467130e-01 | 0.8207499 | 1.092008e+00 |
| ZNF750_rs11077947AG   | 1.029456e+00 | 0.8820903 | 1.201441e+00 |
| ZNF750_rs11077947GG   | 9.128901e-01 | 0.7473297 | 1.115128e+00 |
| ZNF750_rs12450046AA   | 1.080404e+00 | 0.4604782 | 2.534913e+00 |
| ZNF750_rs12450046AG   | NA           | NA        | NA           |
| TRAF3IP2_rs13190932AA | 1.205804e+00 | 0.8178692 | 1.777746e+00 |
| TRAF3IP2_rs13190932AG | 5.060110e-01 | 0.2426656 | 1.055144e+00 |
| TRAF3IP2_rs13196377AA | NA           | NA        | NA           |
| TRAF3IP2_rs13196377AG | 1.519863e+00 | 0.8230853 | 2.806493e+00 |
| TRAF3IP2_rs13210247AG | 1.312683e+00 | 0.9401031 | 1.832924e+00 |
| TRAF3IP2_rs13210247GG | NA           | NA        | NA           |
| TRAF3IP2_rs33980500CT | 1.024978e+00 | 0.8073066 | 1.301340e+00 |
| TRAF3IP2_rs33980500TT | NA           | NA        | NA           |

per allele:

glm(formula = NAPSI ~ ., data = CASES\_PSO)

Coefficients:

|                     | Estimate  | Std. Error | t value | Pr(> t ) |     |
|---------------------|-----------|------------|---------|----------|-----|
| sexM                | 0.068397  | 0.061580   | 1.111   | 0.268017 |     |
| FH01                | -0.064752 | 0.059199   | -1.094  | 0.275338 |     |
| yob                 | -0.006655 | 0.001829   | -3.639  | 0.000348 | *** |
| LZS                 | 0.245142  | 0.079417   | 3.087   | 0.002307 | **  |
| PASI                | 0.193058  | 0.064358   | 3.000   | 0.003042 | **  |
| skinII              | 0.544372  | 0.433498   | 1.256   | 0.210652 |     |
| skinIII             | 0.521111  | 0.436841   | 1.193   | 0.234305 |     |
| skinIII/IV          | 0.049235  | 0.531667   | 0.093   | 0.926310 |     |
| skinIV              | 0.485872  | 0.490417   | 0.991   | 0.323002 |     |
| smoke               | 0.042173  | 0.061788   | 0.683   | 0.495676 |     |
| L.kros1k.           | -0.115693 | 0.131415   | -0.880  | 0.379709 |     |
| RAPTOR_rs869190     | -0.154167 | 0.103244   | -1.493  | 0.136936 |     |
| RAPTOR_rs11658698   | -0.043929 | 0.047108   | -0.933  | 0.352182 |     |
| RAPTOR_rs12602885   | 0.054061  | 0.105496   | 0.512   | 0.608900 |     |
| ZNF750_rs8074277    | -0.182289 | 0.440408   | -0.414  | 0.679380 |     |
| ZNF750_rs11077947   | -0.045484 | 0.050115   | -0.908  | 0.365180 |     |
| ZNF750_rs12450046   | 0.111158  | 0.430865   | 0.258   | 0.796679 |     |
| TRAF3IP2_rs13190932 | -0.619450 | 0.370114   | -1.674  | 0.095742 | .   |
| TRAF3IP2_rs13196377 | 0.409036  | 0.309192   | 1.323   | 0.187357 |     |
| TRAF3IP2_rs13210247 | 0.260608  | 0.165828   | 1.572   | 0.117618 |     |
| TRAF3IP2_rs33980500 | 0.007141  | 0.120445   | 0.059   | 0.952782 |     |

|         | OR           | 2.5 %     | 97.5 %       |
|---------|--------------|-----------|--------------|
| sexM    | 1.070790e+00 | 0.9490464 | 1.208151e+00 |
| FH01    | 9.372995e-01 | 0.8346193 | 1.052612e+00 |
| yob     | 9.933670e-01 | 0.9898124 | 9.969344e-01 |
| LZS     | 1.277803e+00 | 1.0936141 | 1.493013e+00 |
| PASI    | 1.212953e+00 | 1.0692091 | 1.376022e+00 |
| skinII  | 1.723525e+00 | 0.7369254 | 4.030991e+00 |
| skinIII | 1.683897e+00 | 0.7152796 | 3.964199e+00 |

|                     |              |           |              |
|---------------------|--------------|-----------|--------------|
| skinIII/IV          | 1.050467e+00 | 0.3705323 | 2.978095e+00 |
| skinIV              | 1.625591e+00 | 0.6216804 | 4.250651e+00 |
| smoke               | 1.043075e+00 | 0.9241055 | 1.177361e+00 |
| L.kros1k.           | 8.907490e-01 | 0.6884859 | 1.152433e+00 |
| RAPTOR_rs869190     | 8.571289e-01 | 0.7001080 | 1.049367e+00 |
| RAPTOR_rs11658698   | 9.570215e-01 | 0.8726155 | 1.049592e+00 |
| RAPTOR_rs12602885   | 1.055549e+00 | 0.8583809 | 1.298005e+00 |
| ZNF750_rs8074277    | 8.333608e-01 | 0.3515257 | 1.975646e+00 |
| ZNF750_rs11077947   | 9.555352e-01 | 0.8661408 | 1.054156e+00 |
| ZNF750_rs12450046   | 1.117572e+00 | 0.4803106 | 2.600330e+00 |
| TRAF3IP2_rs13190932 | 5.382403e-01 | 0.2605762 | 1.111777e+00 |
| TRAF3IP2_rs13196377 | 1.505367e+00 | 0.8212168 | 2.759477e+00 |
| TRAF3IP2_rs13210247 | 1.297719e+00 | 0.9376220 | 1.796113e+00 |
| TRAF3IP2_rs33980500 | 1.007166e+00 | 0.7953859 | 1.275336e+00 |

LZS and PASI are significantly associated with NAPSI

\*\*\*\*\* Pustular psoriasis as dependent variable \*\*\*\*\*

glm(formula = L.kros1k. ~ ., data = CASES\_PSO2)

|                       | Estimate  | Std. Error | t value | Pr(> t )   |
|-----------------------|-----------|------------|---------|------------|
| sexM                  | -0.087618 | 0.033087   | -2.648  | 0.00875 ** |
| FH01                  | -0.028885 | 0.032481   | -0.889  | 0.37494    |
| yob                   | -0.001829 | 0.001029   | -1.777  | 0.07709 .  |
| LZS                   | -0.060256 | 0.044099   | -1.366  | 0.17338    |
| PASI                  | -0.052178 | 0.035619   | -1.465  | 0.14455    |
| NAPSI                 | -0.030657 | 0.038390   | -0.799  | 0.42551    |
| skinII                | 0.073910  | 0.236201   | 0.313   | 0.75468    |
| skinIII               | 0.109024  | 0.238091   | 0.458   | 0.64752    |
| skinIII/IV            | -0.054377 | 0.289372   | -0.188  | 0.85114    |
| skinIV                | 0.203394  | 0.267241   | 0.761   | 0.44752    |
| smoke                 | 0.085845  | 0.033020   | 2.600   | 0.01004 *  |
| RAPTOR_rs869190GT     | 0.041144  | 0.059624   | 0.690   | 0.49097    |
| RAPTOR_rs869190TT     | 0.061268  | 0.238182   | 0.257   | 0.79727    |
| RAPTOR_rs11658698CT   | -0.001251 | 0.034217   | -0.037  | 0.97087    |
| RAPTOR_rs11658698TT   | -0.076710 | 0.058705   | -1.307  | 0.19284    |
| RAPTOR_rs12602885AA   | -0.067324 | 0.248165   | -0.271  | 0.78646    |
| RAPTOR_rs12602885AG   | -0.070076 | 0.060490   | -1.158  | 0.24808    |
| ZNF750_rs8074277CC    | 0.125753  | 0.266272   | 0.472   | 0.63726    |
| ZNF750_rs8074277CT    | 0.018998  | 0.039249   | 0.484   | 0.62889    |
| ZNF750_rs11077947AG   | -0.006785 | 0.042445   | -0.160  | 0.87316    |
| ZNF750_rs11077947GG   | -0.033260 | 0.055023   | -0.604  | 0.54623    |
| ZNF750_rs12450046AA   | -0.158273 | 0.233986   | -0.676  | 0.49957    |
| ZNF750_rs12450046AG   | NA        | NA         | NA      | NA         |
| TRAF3IP2_rs13190932AA | -0.023369 | 0.106854   | -0.219  | 0.82711    |
| TRAF3IP2_rs13190932AG | -0.042490 | 0.203513   | -0.209  | 0.83483    |
| TRAF3IP2_rs13196377AA | NA        | NA         | NA      | NA         |
| TRAF3IP2_rs13196377AG | -0.064513 | 0.169160   | -0.381  | 0.70334    |
| TRAF3IP2_rs13210247AG | -0.011631 | 0.092285   | -0.126  | 0.89983    |
| TRAF3IP2_rs13210247GG | NA        | NA         | NA      | NA         |
| TRAF3IP2_rs33980500CT | 0.144912  | 0.064753   | 2.238   | 0.02635 *  |
| TRAF3IP2_rs33980500TT | NA        | NA         | NA      | NA         |

|      | OR        | 2.5 %     | 97.5 %    |
|------|-----------|-----------|-----------|
| sexM | 0.9161111 | 0.8585870 | 0.9774893 |
| FH01 | 0.9715282 | 0.9116059 | 1.0353893 |
| yob  | 0.9981730 | 0.9961619 | 1.0001881 |
| LZS  | 0.9415232 | 0.8635627 | 1.0265220 |
| PASI | 0.9491596 | 0.8851564 | 1.0177906 |

|                       |           |           |           |
|-----------------------|-----------|-----------|-----------|
| NAPSI                 | 0.9698083 | 0.8995151 | 1.0455947 |
| skinII                | 1.0767104 | 0.6777108 | 1.7106195 |
| skinIII               | 1.1151893 | 0.6993355 | 1.7783269 |
| skinIII/IV            | 0.9470753 | 0.5371194 | 1.6699297 |
| skinIV                | 1.2255550 | 0.7258667 | 2.0692301 |
| smoke                 | 1.0896373 | 1.0213508 | 1.1624895 |
| RAPTOR_rs869190GT     | 1.0420022 | 0.9270788 | 1.1711718 |
| RAPTOR_rs869190TT     | 1.0631839 | 0.6666040 | 1.6956993 |
| RAPTOR_rs11658698CT   | 0.9987495 | 0.9339656 | 1.0680270 |
| RAPTOR_rs11658698TT   | 0.9261581 | 0.8254972 | 1.0390936 |
| RAPTOR_rs12602885AA   | 0.9348926 | 0.5748092 | 1.5205466 |
| RAPTOR_rs12602885AG   | 0.9323230 | 0.8280887 | 1.0496777 |
| ZNF750_rs8074277CC    | 1.1340017 | 0.6729193 | 1.9110166 |
| ZNF750_rs8074277CT    | 1.0191801 | 0.9437180 | 1.1006763 |
| ZNF750_rs11077947AG   | 0.9932379 | 0.9139534 | 1.0794003 |
| ZNF750_rs11077947GG   | 0.9672870 | 0.8683997 | 1.0774349 |
| ZNF750_rs12450046AA   | 0.8536170 | 0.5396274 | 1.3503057 |
| ZNF750_rs12450046AG   | NA        | NA        | NA        |
| TRAF3IP2_rs13190932AA | 0.9769015 | 0.7923127 | 1.2044948 |
| TRAF3IP2_rs13190932AG | 0.9583996 | 0.6431555 | 1.4281613 |
| TRAF3IP2_rs13196377AA | NA        | NA        | NA        |
| TRAF3IP2_rs13196377AG | 0.9375241 | 0.6729660 | 1.3060859 |
| TRAF3IP2_rs13210247AG | 0.9884362 | 0.8248896 | 1.1844084 |
| TRAF3IP2_rs13210247GG | NA        | NA        | NA        |
| TRAF3IP2_rs33980500CT | 1.1559380 | 1.0181608 | 1.3123591 |
| TRAF3IP2_rs33980500TT | NA        | NA        | NA        |

per allele:

glm(formula = L.kros1k. ~ ., data = CASES\_PSO)

Coefficients:

|                     | Estimate  | Std. Error | t value | Pr(> t ) |    |
|---------------------|-----------|------------|---------|----------|----|
| sexM                | -0.090065 | 0.032393   | -2.780  | 0.00594  | ** |
| FH01                | -0.032783 | 0.031644   | -1.036  | 0.30144  |    |
| yob                 | -0.001706 | 0.001002   | -1.703  | 0.09004  | .  |
| LZS                 | -0.058714 | 0.043231   | -1.358  | 0.17593  |    |
| PASI                | -0.057494 | 0.034916   | -1.647  | 0.10118  |    |
| NAPSI               | -0.033037 | 0.037527   | -0.880  | 0.37971  |    |
| skinII              | 0.071761  | 0.232500   | 0.309   | 0.75791  |    |
| skinIII             | 0.102150  | 0.234149   | 0.436   | 0.66311  |    |
| skinIII/IV          | -0.042377 | 0.284102   | -0.149  | 0.88158  |    |
| skinIV              | 0.208449  | 0.262295   | 0.795   | 0.42771  |    |
| smoke               | 0.086999  | 0.032485   | 2.678   | 0.00801  |    |
| RAPTOR_rs869190     | 0.046813  | 0.055377   | 0.845   | 0.39891  |    |
| RAPTOR_rs11658698   | -0.023163 | 0.025175   | -0.920  | 0.35863  |    |
| RAPTOR_rs12602885   | -0.062285 | 0.056241   | -1.107  | 0.26941  |    |
| ZNF750_rs8074277    | 0.143281  | 0.235229   | 0.609   | 0.54313  |    |
| ZNF750_rs11077947   | -0.016378 | 0.026810   | -0.611  | 0.54197  |    |
| ZNF750_rs12450046   | -0.130931 | 0.230099   | -0.569  | 0.56997  |    |
| TRAF3IP2_rs13190932 | -0.049512 | 0.199117   | -0.249  | 0.80388  |    |
| TRAF3IP2_rs13196377 | -0.073194 | 0.165860   | -0.441  | 0.65947  |    |
| TRAF3IP2_rs13210247 | -0.008649 | 0.089153   | -0.097  | 0.92281  |    |
| TRAF3IP2_rs33980500 | 0.144931  | 0.063551   | 2.281   | 0.02362  | *  |

|      | OR        | 2.5 %     | 97.5 %    |
|------|-----------|-----------|-----------|
| sexM | 0.9138718 | 0.8576538 | 0.9737748 |
| FH01 | 0.9677485 | 0.9095510 | 1.0296698 |
| yob  | 0.9982952 | 0.9963371 | 1.0002571 |
| LZS  | 0.9429760 | 0.8663678 | 1.0263583 |
| PASI | 0.9441277 | 0.8816792 | 1.0109993 |

|                     |           |           |           |
|---------------------|-----------|-----------|-----------|
| NAPSI               | 0.9675025 | 0.8988955 | 1.0413459 |
| skinII              | 1.0743981 | 0.6811788 | 1.6946085 |
| skinIII             | 1.1075495 | 0.6999307 | 1.7525532 |
| skinIII/IV          | 0.9585084 | 0.5492470 | 1.6727234 |
| skinIV              | 1.2317663 | 0.7366522 | 2.0596534 |
| smoke               | 1.0908957 | 1.0236049 | 1.1626101 |
| RAPTOR_rs869190     | 1.0479265 | 0.9401429 | 1.1680672 |
| RAPTOR_rs11658698   | 0.9771032 | 0.9300607 | 1.0265251 |
| RAPTOR_rs12602885   | 0.9396153 | 0.8415458 | 1.0491134 |
| ZNF750_rs8074277    | 1.1540539 | 0.7277785 | 1.8300079 |
| ZNF750_rs11077947   | 0.9837557 | 0.9333967 | 1.0368316 |
| ZNF750_rs12450046   | 0.8772783 | 0.5588264 | 1.3772026 |
| TRAF3IP2_rs13190932 | 0.9516938 | 0.6441818 | 1.4060023 |
| TRAF3IP2_rs13196377 | 0.9294208 | 0.6714788 | 1.2864487 |
| TRAF3IP2_rs13210247 | 0.9913883 | 0.8324472 | 1.1806765 |
| TRAF3IP2_rs33980500 | 1.1559602 | 1.0205824 | 1.3092955 |

\*\*\*\*\* PASI as dependent variable (mild/severe) <10>\*\*\*\*\*

glm(formula = PASI ~ ., data = CASES\_PSO2)

Deviance Residuals:

| Min     | 1Q      | Median  | 3Q     | Max    |
|---------|---------|---------|--------|--------|
| -0.6712 | -0.3540 | -0.1576 | 0.4755 | 0.9381 |

Coefficients: (4 not defined because of singularities)

|                       | Estimate   | Std. Error | t value | Pr(> t ) |    |
|-----------------------|------------|------------|---------|----------|----|
| sexM                  | 0.1570427  | 0.0662172  | 2.372   | 0.01868  | *  |
| FH01                  | 0.0545064  | 0.0647961  | 0.841   | 0.40126  |    |
| yob                   | 0.0044449  | 0.0020442  | 2.174   | 0.03088  | *  |
| LZS                   | -0.0305096 | 0.0883441  | -0.345  | 0.73020  |    |
| NAPSI                 | 0.2166505  | 0.0751132  | 2.884   | 0.00436  | ** |
| skinII                | 0.2262016  | 0.4709297  | 0.480   | 0.63153  |    |
| skinIII               | 0.2505646  | 0.4747748  | 0.528   | 0.59827  |    |
| skinIII/IV            | 0.5421980  | 0.5758867  | 0.942   | 0.34761  |    |
| skinIV                | 0.2138627  | 0.5335654  | 0.401   | 0.68899  |    |
| smoke                 | 0.1077746  | 0.0665394  | 1.620   | 0.10690  |    |
| pustular.             | -0.2075553 | 0.1416867  | -1.465  | 0.14455  |    |
| RAPTOR_rs869190GT     | -0.0843323 | 0.1189084  | -0.709  | 0.47903  |    |
| RAPTOR_rs869190TT     | -0.4862626 | 0.4738484  | -1.026  | 0.30606  |    |
| RAPTOR_rs11658698CT   | -0.0323401 | 0.0682053  | -0.474  | 0.63591  |    |
| RAPTOR_rs11658698TT   | 0.0476735  | 0.1175428  | 0.406   | 0.68549  |    |
| RAPTOR_rs12602885AA   | 0.2974081  | 0.4945870  | 0.601   | 0.54832  |    |
| RAPTOR_rs12602885AG   | 0.0210348  | 0.1210478  | 0.174   | 0.86222  |    |
| ZNF750_rs8074277CC    | 0.1477964  | 0.5312607  | 0.278   | 0.78115  |    |
| ZNF750_rs8074277CT    | -0.0936975 | 0.0780399  | -1.201  | 0.23134  |    |
| ZNF750_rs11077947AG   | 0.0007293  | 0.0846597  | 0.009   | 0.99314  |    |
| ZNF750_rs11077947GG   | 0.1059471  | 0.1095816  | 0.967   | 0.33482  |    |
| ZNF750_rs12450046AA   | -0.3354045 | 0.4666010  | -0.719  | 0.47310  |    |
| ZNF750_rs12450046AG   | NA         | NA         | NA      | NA       |    |
| TRAF3IP2_rs13190932AA | 0.2160520  | 0.2125805  | 1.016   | 0.31073  |    |
| TRAF3IP2_rs13190932AG | 0.9750537  | 0.3999211  | 2.438   | 0.01566  | *  |
| TRAF3IP2_rs13196377AA | NA         | NA         | NA      | NA       |    |
| TRAF3IP2_rs13196377AG | -0.6685707 | 0.3341097  | -2.001  | 0.04677  | *  |
| TRAF3IP2_rs13210247AG | -0.3535427 | 0.1823234  | -1.939  | 0.05393  | .  |
| TRAF3IP2_rs13210247GG | NA         | NA         | NA      | NA       |    |
| TRAF3IP2_rs33980500CT | -0.0201474 | 0.1307786  | -0.154  | 0.87772  |    |
| TRAF3IP2_rs33980500TT | NA         | NA         | NA      | NA       |    |

|                       | OR           | 2.5 %        | 97.5 %    |
|-----------------------|--------------|--------------|-----------|
| sexM                  | 1.1700456236 | 1.027634e+00 | 1.3321925 |
| FH01                  | 1.0560192014 | 9.300735e-01 | 1.1990198 |
| yob                   | 1.0044547543 | 1.000438e+00 | 1.0084873 |
| LZS                   | 0.9699511430 | 8.157390e-01 | 1.1533165 |
| NAPSI                 | 1.2419099756 | 1.071898e+00 | 1.4388866 |
| skinII                | 1.2538284005 | 4.981751e-01 | 3.1556887 |
| skinIII               | 1.2847506313 | 5.066288e-01 | 3.2579757 |
| skinIII/IV            | 1.7197827630 | 5.562601e-01 | 5.3170315 |
| skinIV                | 1.2384525671 | 4.352188e-01 | 3.5241231 |
| smoke                 | 1.1137966254 | 9.776141e-01 | 1.2689495 |
| pustular.             | 0.8125683167 | 6.155395e-01 | 1.0726643 |
| RAPTOR_rs869190GT     | 0.9191257952 | 7.280478e-01 | 1.1603526 |
| RAPTOR_rs869190TT     | 0.6149203127 | 2.429284e-01 | 1.5565366 |
| RAPTOR_rs11658698CT   | 0.9681772220 | 8.470293e-01 | 1.1066526 |
| RAPTOR_rs11658698TT   | 1.0488281938 | 8.330130e-01 | 1.3205563 |
| RAPTOR_rs12602885AA   | 1.3463645804 | 5.107043e-01 | 3.5494074 |
| RAPTOR_rs12602885AG   | 1.0212575731 | 8.055625e-01 | 1.2947065 |
| ZNF750_rs8074277CC    | 1.1592768086 | 4.092392e-01 | 3.2839538 |
| ZNF750_rs8074277CT    | 0.9105581423 | 7.814118e-01 | 1.0610488 |
| ZNF750_rs11077947AG   | 1.0007296022 | 8.477237e-01 | 1.1813516 |
| ZNF750_rs11077947GG   | 1.1117630907 | 8.968839e-01 | 1.3781239 |
| ZNF750_rs12450046AA   | 0.7150487966 | 2.865261e-01 | 1.7844616 |
| ZNF750_rs12450046AG   | NA           | NA           | NA        |
| TRAF3IP2_rs13190932AA | 1.2411669140 | 8.182412e-01 | 1.8826909 |
| TRAF3IP2_rs13190932AG | 2.6513096708 | 1.210729e+00 | 5.8059587 |
| TRAF3IP2_rs13196377AA | NA           | NA           | NA        |
| TRAF3IP2_rs13196377AG | 0.5124404905 | 2.662250e-01 | 0.9863660 |
| TRAF3IP2_rs13210247AG | 0.7021960187 | 4.912069e-01 | 1.0038118 |
| TRAF3IP2_rs13210247GG | NA           | NA           | NA        |
| TRAF3IP2_rs33980500CT | 0.9800542396 | 7.584574e-01 | 1.2663945 |
| TRAF3IP2_rs33980500TT | NA           | NA           | NA        |

per allele:

```
glm(formula = PASI ~ ., data = CASES_PSO)
```

Coefficients:

|                     | Estimate   | Std. Error | t value | Pr(> t )   |
|---------------------|------------|------------|---------|------------|
| sexM                | 0.1544092  | 0.0651732  | 2.369   | 0.01877 *  |
| FH01                | 0.0551369  | 0.0633930  | 0.870   | 0.38546    |
| yob                 | 0.0042946  | 0.0019968  | 2.151   | 0.03269 *  |
| LZS                 | -0.0269939 | 0.0869114  | -0.311  | 0.75643    |
| NAPSI               | 0.2209058  | 0.0736410  | 3.000   | 0.00304 ** |
| skinII              | 0.2201310  | 0.4652590  | 0.473   | 0.63663    |
| skinIII             | 0.2526911  | 0.4685922  | 0.539   | 0.59030    |
| skinIII/IV          | 0.5088197  | 0.5676057  | 0.896   | 0.37109    |
| skinIV              | 0.2035734  | 0.5256746  | 0.387   | 0.69897    |
| smoke               | 0.1086573  | 0.0657272  | 1.653   | 0.09985 .  |
| pustular.           | -0.2303788 | 0.1399070  | -1.647  | 0.10118    |
| RAPTOR_rs869190     | -0.1072771 | 0.1107901  | -0.968  | 0.33406    |
| RAPTOR_rs11658698   | 0.0004809  | 0.0504999  | 0.010   | 0.99241    |
| RAPTOR_rs12602885   | 0.0207468  | 0.1129122  | 0.184   | 0.85440    |
| ZNF750_rs8074277    | 0.2852304  | 0.4708740  | 0.606   | 0.54536    |
| ZNF750_rs11077947   | 0.0552450  | 0.0535764  | 1.031   | 0.30371    |
| ZNF750_rs12450046   | -0.3833005 | 0.4601803  | -0.833  | 0.40586    |
| TRAF3IP2_rs13190932 | 0.9874854  | 0.3925427  | 2.516   | 0.01266 *  |
| TRAF3IP2_rs13196377 | -0.6464257 | 0.3290417  | -1.965  | 0.05084 .  |
| TRAF3IP2_rs13210247 | -0.3403635 | 0.1768522  | -1.925  | 0.05569 .  |
| TRAF3IP2_rs33980500 | -0.0033384 | 0.1288407  | -0.026  | 0.97935    |



|                     | OR           | 2.5 %        | 97.5 %    |
|---------------------|--------------|--------------|-----------|
| sexM                | 1.1669683617 | 1.027031e+00 | 1.3259728 |
| FH01                | 1.0566852478 | 9.332229e-01 | 1.1964812 |
| yob                 | 1.0043037936 | 1.000381e+00 | 1.0082420 |
| LZS                 | 0.9733671503 | 8.209139e-01 | 1.1541328 |
| NAPSI               | 1.2472059246 | 1.079580e+00 | 1.4408591 |
| skinII              | 1.2462400342 | 5.006942e-01 | 3.1019219 |
| skinIII             | 1.2874855447 | 5.138969e-01 | 3.2255867 |
| skinIII/IV          | 1.6633268866 | 5.468028e-01 | 5.0596964 |
| skinIV              | 1.2257750749 | 4.374776e-01 | 3.4345179 |
| smoke               | 1.1147802648 | 9.800363e-01 | 1.2680500 |
| L.kros1k.           | 0.7942326659 | 6.037522e-01 | 1.0448087 |
| RAPTOR_rs869190     | 0.8982767358 | 7.229453e-01 | 1.1161302 |
| RAPTOR_rs11658698   | 1.0004810257 | 9.061983e-01 | 1.1045731 |
| RAPTOR_rs12602885   | 1.0209635571 | 8.182749e-01 | 1.2738587 |
| ZNF750_rs8074277    | 1.3300684331 | 5.285247e-01 | 3.3472080 |
| ZNF750_rs11077947   | 1.0567994594 | 9.514551e-01 | 1.1738075 |
| ZNF750_rs12450046   | 0.6816080348 | 2.765849e-01 | 1.6797354 |
| TRAF3IP2_rs13190932 | 2.6844754650 | 1.243731e+00 | 5.7941859 |
| TRAF3IP2_rs13196377 | 0.5239150511 | 2.749034e-01 | 0.9984852 |
| TRAF3IP2_rs13210247 | 0.7115116724 | 5.030894e-01 | 1.0062801 |
| TRAF3IP2_rs33980500 | 0.9966671725 | 7.742492e-01 | 1.2829789 |

Common variants of ZNF750, RAPTOR and TRAF3IP2 genes and psoriasis risk.

Archives of Dermatological Research.

T. Dębniak, E. Soczawa<sup>2</sup>, M. Boer, M. Różewicka-Czabańska, J. Wiśniewska, P. Serrano-Fernandez, A. Mirecka, K. Paszkowska-Szczur, J. Lubinski, L. Krysztoforska, Z. Adamski, R. Maleszka

Department of Genetics and Pathology, International Hereditary Cancer Center, Pomeranian Medical University, Szczecin, Poland

Email:debniak@pum.edu.pl
